lock caps are available on most stopcocks and pressure monitoring sets.

For departments not using disposable breathing circuits or those not interested in having a mass-spec elbow on each circuit, it is worth noting that the elbow (offered separately) is still a desirable and economic alternative.

ROBERT NEWELL  
Chief Anesthesia Technician  
  
MARK S. SHULMAN, M.D.  
Staff Anesthesiologist

Department of Anesthesiology  
St. Elizabeth's Hospital  
Boston, Massachusetts 02135

# REFERENCES

1. Duckett JE, Zebrowski M: A simple device for delivering bronchodilators into the anesthesia circuit. ANESTHESIOLOGY 62: 700-701, 1985
2. Diamond MJ: Delivering bronchodilators into the anesthesia circuit. ANESTHESIOLOGY 64:531, 1986

(Accepted for publication February 4, 1987.)

Anesthesiology  
66:717, 1987

## A Simple Method by Which to Obtain a Desired Oxygen Concentration

To the Editor:—Several letters have described simple methods by which air and oxygen can be mixed to obtain a desired inspired oxygen concentration ( $FI_{O_2}$ ). Priano *et al.*<sup>1</sup> utilized an Alligation Alternate, and DesMarteau and Byles<sup>2</sup> derived a formula, both of which are relatively easy to use, but must be remembered. We employ a method which allows the construction of a table any time that mixing air and oxygen is necessary.

The key to the method is to use an 8-l total flow ( $\dot{V}_T$ ). As pointed out by DesMarteau and Byles,

$$[\dot{V}_{AIR} = \dot{V}_T \times (1 - FI_{O_2}) \times 1.25] \quad (1)$$

and

$$[\dot{V}_{O_2} = \dot{V}_T - \dot{V}_{AIR}], \quad (2)$$

where  $\dot{V}_{O_2}$  and  $\dot{V}_{AIR}$  are the oxygen and air flow meter settings, and  $\dot{V}_T$  is the total flow. By employing an 8-l total flow, equation 1 becomes

$$[\dot{V}_{AIR} = 10 \times (1 - FI_{O_2})]. \quad (3)$$

Thus, for each .1 increment in  $FI_{O_2}$ ,  $\dot{V}_{AIR}$  changes by 1 l. This allows the instantaneous construction of table 1.

To construct the table, first write the initial line for air alone, and then the final line for oxygen alone. The values for an  $FI_{O_2}$  of .3 to .9 are filled in for the  $\dot{V}_{O_2}$  column by increasing from 1 to 7 l in 1-l steps, and, similarly, for the  $\dot{V}_{AIR}$  column, by decreasing from 7 to 1 l in 1-l steps.

This method does not require the use of a calculator, nomogram, or equation. If the total flow other than 8 l is desired, scaling the table up or down is a simple matter.

An oxygen analyzer gives a double check of the settings, and its use is recommended.

KEVIN W. ROBERTS, M.D.  
Assistant Professor

BERNARD C. DELEO, M.D.  
Professor and Chairman

Department of Anesthesiology  
Albany Medical Center  
New Scotland Avenue  
Albany, NY 12208

TABLE 1.

| $FI_{O_2}$ | $\dot{V}_{O_2}$ | $\dot{V}_{AIR}$ | $\dot{V}_T$ |
|------------|-----------------|-----------------|-------------|
| .20        | 0               | 8               | 8           |
| .3         | 1               | 7               | 8           |
| .4         | 2               | 6               | 8           |
| .5         | 3               | 5               | 8           |
| .6         | 4               | 4               | 8           |
| .7         | 5               | 3               | 8           |
| .8         | 6               | 2               | 8           |
| .9         | 7               | 1               | 8           |
| 1.0        | 8               | 0               | 8           |

# REFERENCES

1. Priano L, Solanki D, Gloyna D: A simple method for mixing air and oxygen. ANESTHESIOLOGY 57:145-146, 1982
2. DesMarteau JK, Byles PH: Another method of mixing air and oxygen. ANESTHESIOLOGY 58:490, 1983

(Accepted for publication February 4, 1987.)
